# Supplementary material for: TheMarker: a comprehensive database of therapeutic biomarkers
Source: PubMed Central journal article supplement — Nucleic Acids Res. 2023 Oct 18;52(D1):D1450–64. doi: 10.1093/nar/gkad862 (PMC10767989; doi:10.1093/nar/gkad862), 2023-10-18
Supplement: gkad862_supplemental_file.pdf [file gkad862_supplemental_file.pdf]

**Supplementary Information for:**

**TheMarker: a comprehensive database of *therapeutic biomarkers***

Yintao Zhang<sup>1,2,†</sup>, Ying Zhou<sup>1,3,†</sup>, Yuan Zhou<sup>1</sup>, Xinyuan Yu<sup>1</sup>, Xinyi Shen<sup>4</sup>, Yanfeng Hong<sup>5</sup>,  
Yuxin Zhang<sup>1</sup>, Shanshan Wang<sup>6</sup>, Minjie Mou<sup>1</sup>, Jinsong Zhang<sup>1</sup>, Lin Tao<sup>5</sup>, Jianqing Gao<sup>1</sup>,  
Yunqing Qiu<sup>1,3,\*</sup>, Yuzong Chen<sup>7,8,\*</sup>, Feng Zhu<sup>1,2,\*</sup>

<sup>1</sup> College of Pharmaceutical Sciences, The First Affiliated Hospital, The Second Affiliated Hospital, Zhejiang University School of Medicine, Zhejiang University, Hangzhou 310058, China.

<sup>2</sup> Innovation Institute for Artificial Intelligence in Medicine of Zhejiang University, Alibaba-Zhejiang University Joint Research Center of Future Digital Healthcare, Hangzhou 330110, China.

<sup>3</sup> State Key Laboratory for Diagnosis and Treatment of Infectious Disease, Collaborative Innovation Center for Diagnosis and Treatment of Infectious Diseases, Zhejiang Provincial Key Laboratory for Drug Clinical Research and Evaluation, The First Affiliated Hospital, Zhejiang University, Hangzhou, Zhejiang 310000, China.

<sup>4</sup> Department of Environmental Health Sciences, Yale School of Public Health, Yale University, New Haven 06510, USA.

<sup>5</sup> Key Laboratory of Elemene Class Anti-Cancer Chinese Medicines, School of Pharmacy, Hangzhou Normal University, Hangzhou 311121, China.

<sup>6</sup> Qian Xuesen Collaborative Research Center of Astrochemistry and Space Life Sciences, Institute of Drug Discovery Technology, Ningbo University, Ningbo 315211, China.

<sup>7</sup> State Key Laboratory of Chemical Oncogenomics, Key Laboratory of Chemical Biology, The Graduate School at Shenzhen, Tsinghua University, Shenzhen 518055, China.

<sup>8</sup> Institute of Biomedical Health Technology and Engineering, Shenzhen Bay Laboratory, Shenzhen 518000, China.

\*To whom correspondence should be addressed. Tel: +86 189-8946-6518; Fax: +86 571-8820-8444;  
Prof. Feng Zhu, Email: [zhufeng@zju.edu.cn](mailto:zhufeng@zju.edu.cn)

Correspondence may also be addressed to Prof. Yuzong Chen. Email: [chenyuzong@sz.tsinghua.edu.cn](mailto:chenyuzong@sz.tsinghua.edu.cn)

Correspondence may also be addressed to Prof. Yunqing Qiu. Email: [qiuyq@zju.edu.cn](mailto:qiuyq@zju.edu.cn)

† These authors contributed equally to this work as co-first authors.

**Supplementary Table S1.** A total of 96 transcriptomics datasets that were collected from NIH-NCBI *Gene Expression Omnibus* (GEO) and EMBL-EBI *Expression Atlas* (GXA). The analyses of these transcriptomic data were reported to be critical for the investigation of the variations in treatment responses, which provided a valuable opportunity to discover *predictive biomarkers* (PRDs) and unravel the molecular mechanisms underlying drug response/resistance and capable of reflecting a particular pattern of genes that could be associated with the therapy-induced toxicities, providing a sensitive and specific panel of *safety biomarkers* (SAFs) as well as insights in the mechanistic aspect of toxicity. A list of acronyms was provided at the end of this table, which were applied here to describe the combinatorial therapies involved in those provided transcriptomic datasets.

| Involved Therapy                                                                                                  | Dataset ID  | Description on the Case Group                | Description on the Control Group                 |
|-------------------------------------------------------------------------------------------------------------------|-------------|----------------------------------------------|--------------------------------------------------|
| <b>List of Transcriptomic Datasets Used to Facilitate the Identification of <i>Predictive Biomarker</i> (PRD)</b> |             |                                              |                                                  |
| Anti-PD1/PD-L1                                                                                                    | GSE135222   | 6 samples responding to the studied therapy  | 21 samples not responding to the studied therapy |
| Azacitidine                                                                                                       | E-MTAB-8208 | 18 samples responding to the studied therapy | 21 samples not responding to the studied therapy |
| Bevacizumab                                                                                                       | GSE19860    | 5 samples responding to the studied therapy  | 7 samples not responding to the studied therapy  |
| BMS-536924                                                                                                        | GSE18912    | 5 samples sensitive to the studied therapy   | 5 samples resistant to the studied therapy       |
| Carboplatin                                                                                                       | GSE15622    | 8 samples sensitive to the studied therapy   | 6 samples resistant to the studied therapy       |
| Carfilzomib                                                                                                       | GSE69078    | 6 samples sensitive to the studied therapy   | 6 samples resistant to the studied therapy       |
| CB-5083                                                                                                           | E-MTAB-7328 | 6 samples sensitive to the studied therapy   | 6 samples resistant to the studied therapy       |
| Cisplatin                                                                                                         | GSE23554    | 18 samples responding to the studied therapy | 10 samples not responding to the studied therapy |
| Cisplatin                                                                                                         | GSE21656    | 3 samples sensitive to the studied therapy   | 3 samples resistant to the studied therapy       |

|                  |            |                                              |                                                  |
|------------------|------------|----------------------------------------------|--------------------------------------------------|
| Cyclophosphamide | GSE7114    | 5 samples sensitive to the studied therapy   | 5 samples resistant to the studied therapy       |
| Dasatinib        | GSE59357   | 9 samples sensitive to the studied therapy   | 9 samples resistant to the studied therapy       |
| Dasatinib        | GSE9633    | 11 samples sensitive to the studied therapy  | 5 samples resistant to the studied therapy       |
| Decitabine       | GSE84334   | 18 samples responding to the studied therapy | 20 samples not responding to the studied therapy |
| Docetaxel        | GSE33455   | 3 samples sensitive to the studied therapy   | 3 samples resistant to the studied therapy       |
| Epirubicin       | GSE16446   | 16 samples responding to the studied therapy | 98 samples not responding to the studied therapy |
| Etoposide        | GSE28413   | 3 samples sensitive to the studied therapy   | 3 samples resistant to the studied therapy       |
| Fluorouracil     | GSE196900  | 4 samples sensitive to the studied therapy   | 4 samples resistant to the studied therapy       |
| Fulvestrant      | GSE48905   | 15 samples responding to the studied therapy | 2 samples not responding to the studied therapy  |
| Gefitinib        | GSE10696   | 3 samples sensitive to the studied therapy   | 3 samples resistant to the studied therapy       |
| Glucocorticoid   | GSE5820    | 13 samples sensitive to the studied therapy  | 16 samples resistant to the studied therapy      |
| Ibrutinib        | GSE93984   | 13 samples responding to the studied therapy | 47 samples not responding to the studied therapy |
| Imatinib         | E-MEXP-433 | 30 samples responding to the studied therapy | 15 samples not responding to the studied therapy |
| Imatinib         | GSE14671   | 41 samples responding to the studied therapy | 18 samples not responding to the studied therapy |
| Insulin          | GSE79636   | 6 samples sensitive to the studied therapy   | 6 samples resistant to the studied therapy       |

|              |          |                                              |                                                  |
|--------------|----------|----------------------------------------------|--------------------------------------------------|
| Irradiation  | GSE9713  | 3 samples sensitive to the studied therapy   | 3 samples resistant to the studied therapy       |
| Lapatinib    | GSE16179 | 3 samples sensitive to the studied therapy   | 3 samples resistant to the studied therapy       |
| Lapatinib    | GSE38376 | 3 samples sensitive to the studied therapy   | 3 samples resistant to the studied therapy       |
| Letrozole    | GSE20181 | 37 samples responding to the studied therapy | 15 samples not responding to the studied therapy |
| Melphalan    | GSE19293 | 24 samples responding to the studied therapy | 28 samples not responding to the studied therapy |
| Melphalan    | GSE34599 | 8 samples responding to the studied therapy  | 7 samples not responding to the studied therapy  |
| Methotrexate | GSE16085 | 3 samples sensitive to the studied therapy   | 3 samples resistant to the studied therapy       |
| Methotrexate | GSE81259 | 29 samples responding to the studied therapy | 18 samples not responding to the studied therapy |
| Methotrexate | GSE11440 | 3 samples sensitive to the studied therapy   | 3 samples resistant to the studied therapy       |
| Methotrexate | GSE16066 | 3 samples sensitive to the studied therapy   | 3 samples resistant to the studied therapy       |
| Methotrexate | GSE16070 | 3 samples sensitive to the studied therapy   | 3 samples resistant to the studied therapy       |
| Methotrexate | GSE16080 | 3 samples sensitive to the studied therapy   | 3 samples resistant to the studied therapy       |
| Methotrexate | GSE16082 | 3 samples sensitive to the studied therapy   | 3 samples resistant to the studied therapy       |
| Methotrexate | GSE16089 | 3 samples sensitive to the studied therapy   | 3 samples resistant to the studied therapy       |
| Methotrexate | GSE9412  | 3 samples sensitive to the studied therapy   | 3 samples resistant to the studied therapy       |

|                     |             |                                              |                                                  |
|---------------------|-------------|----------------------------------------------|--------------------------------------------------|
| Neoadjuvant therapy | GSE191127   | 14 samples sensitive to the studied therapy  | 22 samples resistant to the studied therapy      |
| Neoadjuvant therapy | GSE192341   | 24 samples responding to the studied therapy | 61 samples not responding to the studied therapy |
| Nivolumab           | GSE91061    | 10 samples responding to the studied therapy | 39 samples not responding to the studied therapy |
| Pembrolizumab       | GSE145996   | 2 samples responding to the studied therapy  | 2 samples not responding to the studied therapy  |
| Pembrolizumab       | GSE78220    | 15 samples responding to the studied therapy | 13 samples not responding to the studied therapy |
| Platinum            | GSE51373    | 16 samples sensitive to the studied therapy  | 12 samples resistant to the studied therapy      |
| PLX4720             | GSE34299    | 2 samples sensitive to the studied therapy   | 2 samples resistant to the studied therapy       |
| Paclitaxel          | GSE15622    | 13 samples sensitive to the studied therapy  | 7 samples resistant to the studied therapy       |
| Radiation           | GSE9712     | 3 samples sensitive to the studied therapy   | 3 samples resistant to the studied therapy       |
| SN38                | E-MEXP-1171 | 3 samples sensitive to the studied therapy   | 3 samples resistant to the studied therapy       |
| Tamoxifen           | GSE26459    | 3 samples sensitive to the studied therapy   | 3 samples resistant to the studied therapy       |
| TRAIL               | GSE55859    | 4 samples sensitive to the studied therapy   | 4 samples resistant to the studied therapy       |
| Trastuzumab         | GSE37946    | 27 samples responding to the studied therapy | 23 samples not responding to the studied therapy |
| Trastuzumab         | GSE44272    | 29 samples responding to the studied therapy | 16 samples not responding to the studied therapy |
| Vincristine         | GSE7556     | 2 samples sensitive to the studied therapy   | 2 samples resistant to the studied therapy       |

|                         |           |                                              |                                                   |
|-------------------------|-----------|----------------------------------------------|---------------------------------------------------|
| Vismodegib              | GSE58375  | 4 samples sensitive to the studied therapy   | 9 samples resistant to the studied therapy        |
| WZ4002                  | GSE37699  | 3 samples sensitive to the studied therapy   | 3 samples resistant to the studied therapy        |
| 2-fluoropyrimidine      | GSE122246 | 12 samples responding to the studied therapy | 12 samples not responding to the studied therapy  |
| AraC+IDA                | GSE103424 | 18 samples responding to the studied therapy | 18 samples not responding to the studied therapy  |
| ATC+TAX                 | GSE25066  | 99 samples responding to the studied therapy | 272 samples not responding to the studied therapy |
| BEV+CIS                 | GSE103668 | 7 samples responding to the studied therapy  | 14 samples not responding to the studied therapy  |
| BTZ+DXM+THA             | GSE68871  | 14 samples with complete response reported   | 42 samples with partial response reported only    |
| CAP+CYC+DTX <i>etc.</i> | GSE42822  | 25 samples responding to the studied therapy | 41 samples not responding to the studied therapy  |
| CAP+DTX                 | GSE18728  | 8 samples responding to the studied therapy  | 13 samples not responding to the studied therapy  |
| CBP+PTX                 | GSE14764  | 59 samples responding to the studied therapy | 21 samples not responding to the studied therapy  |
| CHB+RTX                 | GSE35935  | 57 samples responding to the studied therapy | 5 samples not responding to the studied therapy   |
| CIS+DOX+IFF <i>etc.</i> | GSE87437  | 10 samples responding to the studied therapy | 11 samples not responding to the studied therapy  |
| CYC+CAP+FU <i>etc.</i>  | GSE23988  | 20 samples responding to the studied therapy | 41 samples not responding to the studied therapy  |
| CYC+DOX+FU              | GSE20271  | 7 samples responding to the studied therapy  | 75 samples not responding to the studied therapy  |
| CYC+DOX+FU <i>etc.</i>  | GSE50948  | 22 samples responding to the studied therapy | 71 samples not responding to the studied therapy  |

|                         |           |                                               |                                                   |
|-------------------------|-----------|-----------------------------------------------|---------------------------------------------------|
| CYC+DOX+VCR <i>etc.</i> | GSE57611  | 10 samples responding to the studied therapy  | 5 samples not responding to the studied therapy   |
| CYC+EPI+FU              | GSE22093  | 29 samples responding to the studied therapy  | 68 samples not responding to the studied therapy  |
| CYC+EPI+FU <i>etc.</i>  | GSE140494 | 63 samples responding to the studied therapy  | 18 samples not responding to the studied therapy  |
| CYC+EPI+PTX <i>etc.</i> | GSE32646  | 27 samples responding to the studied therapy  | 88samples not responding to the studied therapy   |
| DOX+6-MP <i>etc.</i>    | GSE14615  | 30 samples responding to the studied therapy  | 6 samples not responding to the studied therapy   |
| DOX+CYC+FU <i>etc.</i>  | GSE20194  | 46 samples responding to the studied therapy  | 165 samples not responding to the studied therapy |
| FU+IRT+LV               | GSE62080  | 9 samples sensitive to the studied therapy    | 12 samples resistant to the studied therapy       |
| FU+LV+OXA               | GSE19860  | 9 samples responding to the studied therapy   | 20 samples not responding to the studied therapy  |
| FU+LV+OXA               | GSE28702  | 42 samples responding to the studied therapy  | 41 samples not responding to the studied therapy  |
| FU+LV+OXA               | GSE69657  | 7 samples responding to the studied therapy   | 9 samples not responding to the studied therapy   |
| IRT+FU+LV               | GSE72970  | 27 samples responding to the studied therapy  | 33 samples not responding to the studied therapy  |
| IXA+CYC+DOX             | GSE41998  | 105 samples responding to the studied therapy | 31 samples not responding to the studied therapy  |
| LAP+CYC+EPI <i>etc.</i> | GSE66305  | 8 samples responding to the studied therapy   | 23 samples not responding to the studied therapy  |
| LAP+TRA+CYC <i>etc.</i> | GSE66305  | 13 samples responding to the studied therapy  | 21 samples not responding to the studied therapy  |
| NIV+PEM                 | GSE126044 | 5 samples responding to the studied therapy   | 11 samples not responding to the studied therapy  |

|                                                                                                               |           |                                                |                                                  |
|---------------------------------------------------------------------------------------------------------------|-----------|------------------------------------------------|--------------------------------------------------|
| OXA+BEV+FU <i>etc.</i>                                                                                        | GSE72970  | 10 samples responding to the studied therapy   | 16 samples not responding to the studied therapy |
| OXA+FU+LV                                                                                                     | GSE72970  | 20 samples responding to the studied therapy   | 12 samples not responding to the studied therapy |
| PTX+CYC+DOX                                                                                                   | GSE41998  | 90 samples responding to the studied therapy   | 34 samples not responding to the studied therapy |
| PTX+CYC+FU <i>etc.</i>                                                                                        | GSE20271  | 17 samples responding to the studied therapy   | 62 samples not responding to the studied therapy |
| TRA+CAP+EPI <i>etc.</i>                                                                                       | GSE42822  | 12 samples responding to the studied therapy   | 13 samples not responding to the studied therapy |
| TRA+CYC+MTX                                                                                                   | GSE50948  | 31 samples responding to the studied therapy   | 32 samples not responding to the studied therapy |
| TRA+CYC+FU                                                                                                    | GSE66305  | 6 samples responding to the studied therapy    | 17 samples not responding to the studied therapy |
| TRA+DOX+CYC                                                                                                   | GSE20194  | 2 samples responding to the studied therapy    | 4 samples not responding to the studied therapy  |
| TRA+VNR                                                                                                       | GSE70233  | 3 samples responding to the studied therapy    | 19 samples not responding to the studied therapy |
| <b>List of Transcriptomic Datasets Used to Facilitate the Identification of <i>Safety Biomarker</i> (SAF)</b> |           |                                                |                                                  |
| Capecitabine                                                                                                  | GSE171468 | 39 samples with reported hand-foot syndrome    | 18 samples with no toxicity reported             |
| Checkpoint inhibitors                                                                                         | GSE186143 | 43 samples with reported adverse events        | 17 samples with no toxicity reported             |
| Irradiation                                                                                                   | GSE178708 | 10 samples with reported radiotherapy toxicity | 10 samples with no toxicity reported             |

### List of Acronyms Shown in This Table

AraC: cytarabine; ATC: anthracycline



BEV: bevacizumab; BTZ: bortezomib

CAP: capecitabine; CBP: carboplatin; CHB: chlorambucil; CIS: cisplatin; CYC: cyclophosphamide

DOX: doxorubicin; DTX: docetaxel; DXM: examethasone

EPI: epirubicin

FU: 5-fluorouracil

IDA: idarubicin; IFF: ifosfamide; IRT: irinotecan; IXA: ixabepilone

LAP: lapatinib; LV: leucovorin

MTX: methotrexate

NIV: nivolumab

OXA: oxaliplatin

PDN: prednisone; PEM: pembrolizumab; PEX: pemetrexed; PTX: paclitaxel

RTX: rituximab

TAX: taxane; THA: thalidomide; TRA: trastuzumab

VCR: vincristine; VNR: vinorelbine

6-MP: mercaptopurine

**a. Drug Search Results Displayed in Card**

[View by Card](#)
[View by Table](#)
 Filter Search Results by Keyword:

**Drug ID: D6J2KZ**

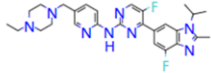

|                                 |                                            |                                |
|---------------------------------|--------------------------------------------|--------------------------------|
| <b>Drug Name</b>                | Abemaciclib                                | <a href="#">Drug Info</a>      |
| <b>Drug Type</b>                | Small molecule                             |                                |
| <b>Drug Status</b>              | Approved                                   |                                |
| <b>Representative Biomarker</b> | Epidermal growth factor receptor (Protein) | <a href="#">Biomarker Info</a> |
| <b>Representative Disease</b>   | Breast cancer [ICD-11: 2B60]               | <a href="#">Disease Info</a>   |

**b. Drug Search Results Presented in Table**

[View by Card](#)
[View by Table](#)
 Filter Search Results by Keyword:

| Drug ID | Drug Name    | Structure                 | Drug Type      | Status   | Biomarker           | Disease              |
|---------|--------------|---------------------------|----------------|----------|---------------------|----------------------|
| D6J2KZ  | Abemaciclib  | <a href="#">Structure</a> | Small molecule | Approved | Epidermal growth... | Breast cancer [IC... |
| D9P1YD  | Afatinib     | <a href="#">Structure</a> | Small molecule | Approved | EGFR (Gene)         | Lung cancer [ICD..   |
| DQK97E  | Bortezomib   | <a href="#">Structure</a> | Small molecule | Approved | EGF mRNA (mR...     | Healthy [ICD-11: ... |
| DUID31  | Capecitabine | <a href="#">Structure</a> | Small molecule | Approved | EGF mRNA (mR...     | Esophageal canc...   |
| DC27QH  | Cisplatin    | <a href="#">Structure</a> | Small molecule | Approved | EGF mRNA (mR...     | Esophageal canc...   |
| DHB28G  | Epirubicin   | <a href="#">Structure</a> | Small molecule | Approved | EGF mRNA (mR...     | Gastric cancer [I... |
| DXY71I  | Erlotinib    | <a href="#">Structure</a> | Small molecule | Approved | Long noncoding ...  | Lung cancer [ICD..   |
| DBM0Y9  | Fluorouracil | <a href="#">Structure</a> | Small molecule | Approved | EGFR mRNA (m...     | Colorectal cancer..  |
| DT60XW  | Gefitinib    | <a href="#">Structure</a> | Small molecule | Approved | RAPGEF4 mRNA...     | Skin squamous c...   |
| DF2PE3  | Gentamicin   | <a href="#">Structure</a> | Small molecule | Approved | NGEF mRNA (m...     | Healthy [ICD-11: ... |

**Supplementary Figure S1.** Two views of the searching results page. (a) search results displayed in table; (b) search results presented in card. User can select their preferred view by clicking the buttons of 'View by Table' and 'View by Card'. In both views, all drug data are filtered according to the entering of the particular keywords.

**a. Biomarker Information Displayed in Table**

Filter Biomarkers by Keyword:

**Filter by Biomarker Class(es):**

DNA biomarker     
  LncRNA biomarker     
  microRNA biomarker     
  mRNA biomarker  
 Chemical biomarker     
  Protein biomarker     
  Cell-related biomarker     
  Other biomarker

| ID     | Biomarker Name        | Gene Name      | Biomarker Class   | Biomarker Type |
|--------|-----------------------|----------------|-------------------|----------------|
| B3HTD6 | C-reactive protein    | CRP; PTX1      | Protein biomarker | R S P M U      |
| BM7DL8 | Interleukin 6         | IL6; IFNB2     | Protein biomarker | R S P M U      |
| BPV52Q | Tumor necrosis factor | TNF; TNFA; ... | Protein biomarker | R S P M U      |
| B0ZM5L | Complement C3         | C3; CPAMD1     | Protein biomarker | R S P M U      |
| B1TVG9 | C-C motif chemokine 2 | CCL2; MCP1...  | Protein biomarker | R S P M U      |

**b. Biomarker Information Presented in Card**

Filter Biomarkers by Keyword:

**Filter by Biomarker Class(es):**

DNA biomarker     
  LncRNA biomarker     
  microRNA biomarker     
  mRNA biomarker  
 Chemical biomarker     
  Protein biomarker     
  Cell-related biomarker     
  Other biomarker

**Biomarker ID: B3HTD6**

**Biomarker Name** C-reactive protein

**Biomarker Class** Protein biomarker

**Gene Name** CRP; PTX1

**Biomarker Type**

**Supplementary Figure S2.** Two views of browse page in TheMarker. (a) browse data displayed in table; (b) browse data presented in card. User can choose their preferred view by clicking the buttons of ‘View by Table’ and ‘View by Card’. In both views, all therapeutic biomarker data can be filtered by selecting specific biomarker classes or by entering particular keywords.

### a. General Information of the Biomarker

|                                                |                                                                                                                                                                                                                                                                                                                                 |
|------------------------------------------------|---------------------------------------------------------------------------------------------------------------------------------------------------------------------------------------------------------------------------------------------------------------------------------------------------------------------------------|
| <b>Biomarker Name</b>                          | C-reactive protein                                                                                                                                                                                                                                                                                                              |
| <b>Biomarker Class</b>                         | Protein                                                                                                                                                                                                                                                                                                                         |
| <b>Synonyms</b><br><small>view as list</small> | C reactive protein; PTX1; C-reactive protein                                                                                                                                                                                                                                                                                    |
| <b>Biomarker Type</b>                          | <input checked="" type="checkbox"/> PRD <input checked="" type="checkbox"/> SAF <input checked="" type="checkbox"/> PDB <input checked="" type="checkbox"/> MOI <input type="checkbox"/> SUR                                                                                                                                    |
| <b>Function</b>                                | Displays several functions associated with host defense: it promotes agglutination, bacterial capsular swelling, phagocytosis and complement fixation through its calcium-dependent binding to phosphorylcholine. Can interact with DNA and histones and may scavenge nuclear material released from damaged circulating cells. |

### b. Application(s) of the Biomarker in Drug Development and Clinical Practice

Please Select Biomarker Type(s):

- Predictive Biomarker (PRD)
  Safety Biomarker (SAF)
  Pharmacodynamic Biomarker (PDB)
  Monitoring Biomarker (MOI)
  Surrogate Endpoint (SUR)

Filter Data by Keyword:

| Marker Type | Drug Name        | Drug Status | Disease Name              | ICD           | Marker Mode     | Detail Info                 |
|-------------|------------------|-------------|---------------------------|---------------|-----------------|-----------------------------|
| PRD         | Cyclophosphamide | Approved    | Interstitial lung dise... | ICD-11:CB05   | Serum concen... | <a href="#">detail info</a> |
| PRD         | Ipilimumab       | Approved    | Melanoma                  | ICD-11:2C30   | Serum concen... | <a href="#">detail info</a> |
| SAF         | Nivolumab        | Approved    | Melanoma                  | ICD-11:2C30   | Serum concen... | <a href="#">detail info</a> |
| SAF         | Pembrolizumab    | Approved    | Melanoma                  | ICD-11:2C30   | Serum concen... | <a href="#">detail info</a> |
| SAF         | Trastuzumab      | Approved    | Breast cancer             | ICD-11:2C60   | Concentration   | <a href="#">detail info</a> |
| PDB         | CAN04            | Phase 2     | Solid tumour/cancer       | ICD-11:2A0... | Concentration   | <a href="#">detail info</a> |
| MOI         | Etanercept       | Approved    | Axial and peripheral...   | ICD-11:FA92   | Serum concen... | <a href="#">detail info</a> |
| MOI         | Infliximab       | Approved    | Axial and peripheral...   | ICD-11:FA92   | Serum concen... | <a href="#">detail info</a> |

**Supplementary Figure S3.** Table view of the application(s) of a biomarker in drug development and clinical practice. Users can filter the data by choosing specific biomarker classes or entering the particular keywords.

**TheMarker: a comprehensive database of therapeutic biomarkers**

---

**a. General Information of the Biomarker**

**Biomarker Name** miR-21

**Synonyms** miR 21; microRNA-21; hsa-mir-21; MIR21  
[view as list](#)

**Biomarker Type** **PRD** **SAF** PDB MOI SUR

---

**b. Application of the Biomarker in Diagnosis and Prognosis**

|                           |                   |          |                   |
|---------------------------|-------------------|----------|-------------------|
| <b>Diagnosis</b>          | Bladder cancer    | CRMarker | LiqBioer          |
|                           | Colon cancer      | CRMarker | LiqBioer SalivaDB |
|                           | Colorectal cancer | CBD      | CRMarker LiqBioer |
| <a href="#">Show More</a> |                   |          |                   |
| <b>Prognosis</b>          | Colorectal cancer | CBD      | CRMarker LiqBioer |
|                           | Heart failure     |          | HFBD              |
|                           | Oral cancer       | CRMarker | LiqBioer SalivaDB |
| <a href="#">Show More</a> |                   |          |                   |

**Supplementary Figure S4.** A typical TheMarker page showing related information of diagnosis and prognosis biomarker. For any therapeutic biomarker (ThMAR), the data of its application in diagnosis and prognosis were provided in the bottom of the biomarker page. Users can find more detailed data by clicking the database logos on the right side. Those databases used to collect the diagnosis/prognosis information included: CBD, CMBD, CRC-EBD, CRMarker, CancerLivER, GlioMarker, HFBD, LBD, LiqBioer, Lnc2Cancer, MarkerDB, and SalivaDB.
